## **Na<sup>+</sup>/Ca<sup>2+</sup> ANTIPORT IN THE MAMMALIAN HEART**

JOHN P. REEVES, MADALINA CONDRESCU, GALINA CHERNAYA AND  
JEFFREY P. GARDNER<sup>1</sup>

*Department of Physiology and <sup>1</sup>Hypertension Research Center, University of Medicine  
and Dentistry, New Jersey Medical School, 185 South Orange Avenue, Newark, NJ  
07103, USA*

### **Summary**

The cardiac Na<sup>+</sup>/Ca<sup>2+</sup> antiporter moves 3 Na<sup>+</sup> across the plasma membrane in exchange for a single Ca<sup>2+</sup> moving in the opposite direction. It is the principal Ca<sup>2+</sup> efflux mechanism in myocardial cells; however, it also contributes to Ca<sup>2+</sup> influx under certain conditions. It is particularly abundant in the heart, but is also expressed in other tissues such as smooth and skeletal muscle, the kidney and the brain. The cardiac antiporter itself is a protein of 938 amino acids, with a cleaved NH<sub>2</sub>-terminal signal sequence, 11 putative transmembrane segments and a large hydrophilic domain of 520 amino acids between the fifth and sixth transmembrane segments. Alternative mRNA splicing mechanisms generate tissue-specific isoforms in a limited region within the hydrophilic domain. Most of the hydrophilic domain can be deleted without altering the kinetics of the transport reaction; the regulatory properties of the antiporter are markedly affected by this deletion however. Two different modes of regulation of antiport activity have been characterized and appear to involve two different inactive states of the carrier. The first is promoted by the presence of cytosolic Na<sup>+</sup> in the absence of ATP and the second is promoted by the absence of cytosolic Ca<sup>2+</sup>. ATP-dependent regulation of antiport activity may involve interactions with the cellular cytoskeleton, since the effects of ATP depletion can be mimicked by cytochalasin D. Ca<sup>2+</sup>-dependent regulation of antiport activity appears to involve the interaction of cytosolic Ca<sup>2+</sup> with two acidic amino acid sequences within a limited region of the hydrophilic domain.

### **Introduction**

Na<sup>+</sup>/Ca<sup>2+</sup> antiporters are found in many, but not all, types of cells (see Blaustein *et al.* 1991). In general, they move Ca<sup>2+</sup> in one direction across the plasma membrane in exchange for 3 or 4 Na<sup>+</sup> moving in the opposite direction. The exchange reaction is thought to involve a consecutive reaction mechanism, in which Na<sup>+</sup> and Ca<sup>2+</sup> are translocated in separate steps (Hilgemann *et al.* 1991). Because of the charge imbalance, Na<sup>+</sup>/Ca<sup>2+</sup> antiporters generate a current during their operation and these currents provide an important experimental tool for investigating their activity. There are two general types of plasma membrane Na<sup>+</sup>/Ca<sup>2+</sup> antiporters. The cardiac type, which will be the focus of the present article, has a stoichiometry of 3Na<sup>+</sup>/1Ca<sup>2+</sup> (Reeves and Hale, 1984;

**Key words:** Na<sup>+</sup>/Ca<sup>2+</sup> antiport, heart, cytoskeleton, regulation, Na<sup>+</sup>/Ca<sup>2+</sup> antiport, sarcoplasmic reticulum, cardiac ATP depletion, cytochalasin D.

Kimura *et al.* 1987). This antiporter is particularly abundant in the heart, but is also found in brain, kidney, smooth muscle, skeletal muscle and a variety of secretory cells. The second type of antiporter is found in the retinal rod.  $\text{Ca}^{2+}$  is cotransported with  $\text{K}^+$  by this antiporter and the stoichiometry is  $4\text{Na}^+/(1\text{Ca}^{2+}+1\text{K}^+)$  (Schnetkamp *et al.* 1989; Cervetto *et al.* 1989). The distribution of the retinal rod antiporter is very limited in comparison with that of the cardiac type. It has been definitively identified only in the retinal rod, although a recent report describes a  $\text{K}^+$ -dependent  $\text{Na}^+/\text{Ca}^{2+}$  antiporter in human platelets (Kimura *et al.* 1993). Both antiporters have been cloned, but there is surprisingly little amino acid homology between them (see below). There is also a  $\text{Na}^+/\text{Ca}^{2+}$  antiporter, which catalyzes  $\text{Ca}^{2+}$  efflux from the mitochondria. This antiporter appears to be unrelated to the plasma membrane antiporters, but it has not been very well characterized and will not be discussed further in this chapter.

The major physiological function of the  $\text{Na}^+/\text{Ca}^{2+}$  antiporter is to transport  $\text{Ca}^{2+}$  out of the cell. In the heart, the antiporter is the principal efflux mechanism for cellular  $\text{Ca}^{2+}$  (Hilgemann, 1986; Bers and Bridge, 1989) and competes with the sarcoplasmic reticulum (SR)  $\text{Ca}^{2+}$ -ATPase for cytosolic  $\text{Ca}^{2+}$  (Fig. 1). Approximately 20 % of the  $\text{Ca}^{2+}$  released by the SR is transported out of the cell *via* the  $\text{Na}^+/\text{Ca}^{2+}$  antiporter with each beat, and most of the remainder is re-accumulated by the SR. Changes in the driving force for  $\text{Na}^+/\text{Ca}^{2+}$  antiport activity therefore exert a profound influence on the amount of  $\text{Ca}^{2+}$  taken up by the SR and on the force of contraction of subsequent beats (Fig. 1).

The thermodynamic driving force for  $\text{Na}^+/\text{Ca}^{2+}$  antiport can be expressed in terms of its reversal potential, i.e. the membrane potential at which the exchange system is in equilibrium:

$$\begin{aligned} E_{\text{Na/Ca}} &= 3E_{\text{Na}} - 2E_{\text{Ca}} \\ &= -RTF^{-1} \ln \{ ([\text{Ca}^{2+}]_{\text{o}}/[\text{Ca}^{2+}]_{\text{i}})([\text{Na}^+]_{\text{i}}/[\text{Na}^+]_{\text{o}})^3 \}, \end{aligned} \quad (1)$$

where  $E_{\text{Na/Ca}}$  is the reversal potential,  $E_{\text{Na}}$  and  $E_{\text{Ca}}$  are the equilibrium potentials for  $\text{Na}^+$  and  $\text{Ca}^{2+}$  as defined by the Nernst equation,  $R$  is the gas constant,  $T$  is the absolute temperature and  $F$  is Faraday's constant. At membrane potentials that are more negative than  $E_{\text{Na/Ca}}$ , current will flow into the cell and the exchange system will operate in the direction of  $\text{Ca}^{2+}$  efflux. At membrane potentials more positive than  $E_{\text{Na/Ca}}$ , the exchange current will be outwards and net  $\text{Ca}^{2+}$  influx will occur. For typical values of intra- and extracellular concentrations of  $\text{Na}^+$  and  $\text{Ca}^{2+}$  ( $[\text{Na}^+]_{\text{o}}=140 \text{ mmol l}^{-1}$ ,  $[\text{Ca}^{2+}]_{\text{o}}=2 \text{ mmol l}^{-1}$ ,  $[\text{Na}^+]_{\text{i}}=6 \text{ mmol l}^{-1}$  and  $[\text{Ca}^{2+}]_{\text{i}}=0.1 \mu\text{mol l}^{-1}$ ),  $E_{\text{Na/Ca}}$  is approximately  $-12 \text{ mV}$ . Thus, for this example, the driving force for  $\text{Na}^+/\text{Ca}^{2+}$  antiport at a resting potential ( $E_{\text{m}}$ ) of  $-70 \text{ mV}$  will be in the direction of net  $\text{Ca}^{2+}$  efflux ( $E_{\text{Na/Ca}}-E_{\text{m}}=+58 \text{ mmol l}^{-1}$ ). Because of the cubic relationship in equation 1, relatively small changes in  $[\text{Na}^+]_{\text{i}}$  can markedly affect the driving force of  $\text{Ca}^{2+}$  movements *via* the antiporter. For example, in rat cardiac muscle,  $[\text{Na}^+]_{\text{i}}$  is substantially higher ( $15 \text{ mmol l}^{-1}$ ) than for other mammalian species. In this case,  $E_{\text{Na/Ca}}$  is  $-83 \text{ mV}$  and the antiporter should catalyze net  $\text{Ca}^{2+}$  influx in resting cells ( $E_{\text{Na/Ca}}-E_{\text{m}}=-13 \text{ mV}$ ), as has been observed experimentally (Shattock and Bers, 1989).

The effects of antiport activity on  $[\text{Ca}^{2+}]_{\text{i}}$  in an intact cell are much more complicated

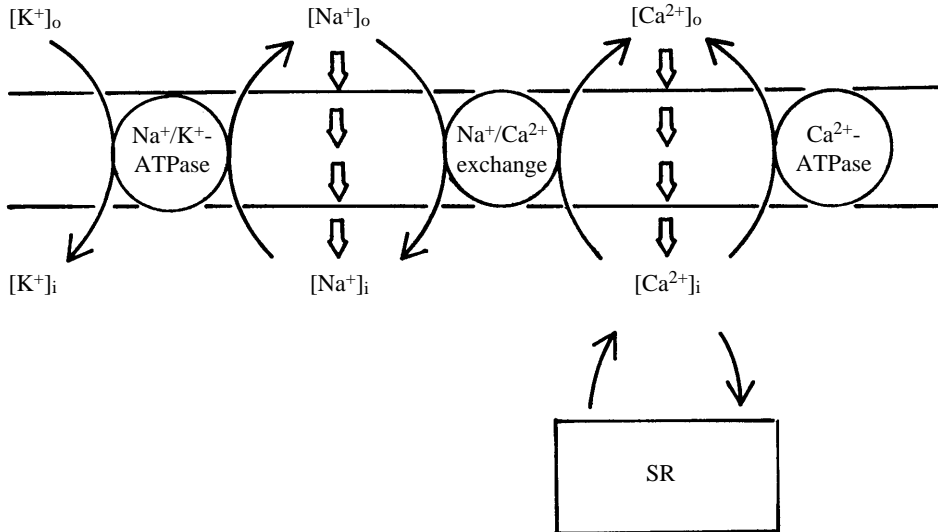

Fig. 1. Ionic homeostasis in cardiac myocytes. The transmembrane  $[\text{Na}^+]$  and  $[\text{K}^+]$  gradients are maintained by the operation of the  $\text{Na}^+/\text{K}^+$ -ATPase. The open arrows represent the entry of  $\text{Na}^+$  and  $\text{Ca}^{2+}$  through voltage-gated channels. Both the  $\text{Na}^+/\text{Ca}^{2+}$  antiporter and the plasma membrane  $\text{Ca}^{2+}$ -ATPase compete for cytosolic  $\text{Ca}^{2+}$  with the sarcoplasmic reticulum (SR)  $\text{Ca}^{2+}$ -ATPase; this competition is one determinant of the amount of  $\text{Ca}^{2+}$  stored in the SR, and has an important effect on the force of cardiac contraction. Reproduced from Reeves (1985) with permission.

than thermodynamic considerations (equation 1) suggest. The turnover of the antiporter is regulated by the affinities of  $\text{Na}^+$  and  $\text{Ca}^{2+}$  for transport sites as well as by secondary interactions of these ions, which regulate transitions of the antiporter between its active and inactive states. The latter regulatory processes will be discussed later in this chapter. Activation of the antiport activity by cytosolic  $\text{Na}^+$  is highly cooperative ( $n=2.7$ ) and exhibits a  $K_m$  of  $18 \text{ mmol l}^{-1}$  (Matsuoka *et al.* 1993). The  $K_m$  for  $\text{Ca}^{2+}$  at the cytosolic transport sites is approximately  $4 \mu\text{mol l}^{-1}$  at  $[\text{Na}^+]_o=150 \text{ mmol l}^{-1}$ . In cardiac cells, the resting cytoplasmic concentrations of  $\text{Na}^+$  ( $4\text{--}8 \text{ mmol l}^{-1}$ ) and  $\text{Ca}^{2+}$  ( $40\text{--}100 \text{ nmol l}^{-1}$ ) are substantially below their respective  $K_m$  values for  $\text{Na}^+/\text{Ca}^{2+}$  antiport, suggesting that the antiporter is operating at only a small percentage of its maximal capacity. Even during contraction,  $[\text{Ca}^{2+}]_i$  rarely exceeds  $1 \mu\text{mol l}^{-1}$ . Transient local concentrations of  $\text{Ca}^{2+}$  immediately adjacent to the cytoplasmic sarcolemmal surface may be substantially higher than those of the bulk cytosol, however. Transient elevations of  $[\text{Na}^+]_i$  appear to drive net  $\text{Ca}^{2+}$  influx *via* the antiporter during the early portions of the cardiac action potential; this transient  $\text{Ca}^{2+}$  influx is thought to contribute to triggering  $\text{Ca}^{2+}$  release from the sarcoplasmic reticulum (Leblanc and Hume, 1990). These local fluctuations in  $[\text{Na}^+]_i$  have been postulated to occur within a subsarcolemmal space (dubbed ‘fuzzy space’; Lederer *et al.* 1990) that equilibrates relatively slowly with the bulk cytoplasm. A possibly related observation is that antiport-mediated  $^{45}\text{Ca}^{2+}$  fluxes in cardiac myocytes *in vitro* appear to involve a subcellular compartment that equilibrates rapidly with the

extracellular space (Post *et al.* 1993). Thus, the functioning of the antiporter in cellular  $\text{Ca}^{2+}$  homeostasis cannot be fully appreciated by thermodynamic and kinetic analyses alone; the influence of cellular architecture must also be considered. Unfortunately, as implied by the term 'fuzzy space', subcellular compartmentation of ion movements is only poorly understood at present.

### Primary structure

The cardiac antiporter was first cloned by Philipson and his colleagues (Nicoll *et al.* 1990), who screened a  $\lambda$ gt11 library from dog ventricle with an antibody to the purified antiporter. Subsequently, cardiac-type antiporters were cloned from bovine and rat heart, rat brain, rabbit kidney and aortic smooth muscle (references cited in Nakasaki *et al.* 1993; Kofuji *et al.* 1994). The canine cardiac antiporter is a protein of 938 amino acids containing 11 hydrophobic stretches of 20 or more amino acids that presumably represent membrane-spanning regions. Between the fifth and sixth transmembrane segments lies a 520-residue hydrophilic domain, which appears to reside on the cytoplasmic surface of the membrane. The suggested orientation of the antiporter in the membrane is depicted schematically in Fig. 2; several regions indicated in the diagram are of special interest.

The  $\text{NH}_2$  terminus of the purified antiporter (region 1, Fig. 2) was found to begin after a 32-residue segment in the deduced cDNA sequence that had the characteristics of a cleaved signal sequence (Durkin *et al.* 1991). Subsequent studies revealed directly that the *in vitro* translated protein was cleaved at the  $\text{NH}_2$  end in the presence of pancreatic microsomes (Hryshko *et al.* 1993). The presence of a cleaved signal sequence is highly unusual in transport proteins; we are unaware of any other porter, with the exception of the retinal rod  $\text{Na}^+/\text{Ca}^{2+}+\text{K}^+$  antiporter (Reiländer *et al.* 1992), which exhibits a cleaved  $\text{NH}_2$ -terminal signal sequence. The functional significance of the signal sequence is

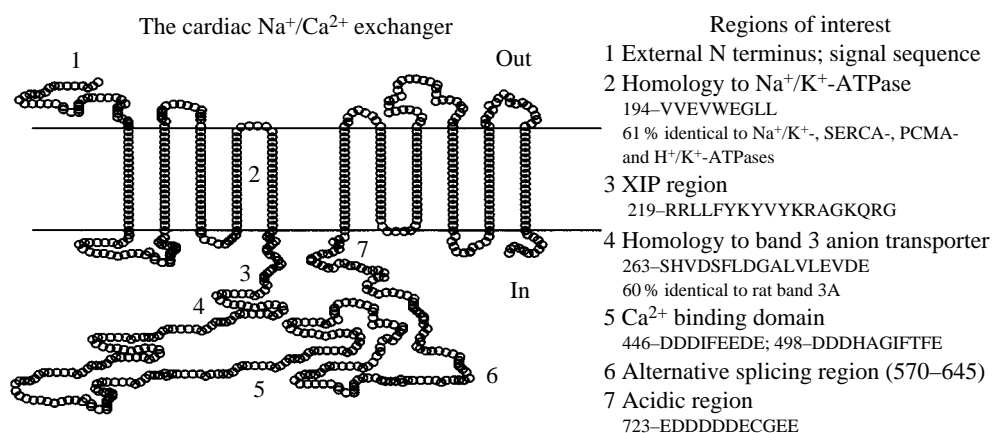

Fig. 2. Orientation of the cardiac  $\text{Na}^+/\text{Ca}^{2+}$  exchanger in the plasma membrane. This diagram is based on hydropathy analysis suggesting the presence of 11 transmembrane spanning segments; the external orientation of the  $\text{NH}_2$  terminus of the protein is based on the presence of an  $\text{NH}_2$ -terminal cleaved signal sequence.

unclear; the NH<sub>2</sub>-terminal region of the mature protein is highly charged and perhaps the signal sequence is necessary to ensure translocation of this portion of the protein to the extracellular membrane surface.

The segment designated region 2 (amino acids 180–202) in Fig. 2 exhibits 43 % identity with a corresponding region in the Na<sup>+</sup>/K<sup>+</sup>-ATPase (Nicoll *et al.* 1990). Moreover, the position of this segment within the protein (the transmembrane segments immediately prior to a large cytoplasmic domain) is similar in the two proteins. At the C-terminal end of this region, there is a nine amino acid sequence (194–VVEVWEGLL) that is 61 % identical to the corresponding regions of the Na<sup>+</sup>/K<sup>+</sup>-, SERCA-, PMCA- and K<sup>+</sup>/H<sup>+</sup>-ATPases. Furthermore, the glutamate residue in position 199 is conserved in all of these ATPases and was found to be one of the critical residues for Ca<sup>2+</sup> binding in the SR Ca<sup>2+</sup>-ATPase (Clarke *et al.* 1989). This residue is also critical for the antiporter, since changing it to glutamine or aspartate abolished activity (Nicoll *et al.* 1994). In contrast, the glutamate at position 196 is not conserved among the various ATPases, and changing it to glutamine had no effect on antiport activity. These studies suggest that this region is involved in ion binding and translocation by the antiporter. Other mutations found to produce inactive antiporters (S109A, S110A, T or C, E113G or D, E199Q or D, T203 V, T810 V, S818A, S838A or N842 V; Nicoll *et al.* 1994) involve polar residues that appear to be located within or near the putative transmembrane segments of the antiporter (see below). In contrast, most of the central hydrophilic domain of the antiporter can be deleted without adverse effects on the kinetics of antiport activity (see below).

Region 3 (residues 219–238) in Fig. 2 is a 20 amino acid span containing mostly basic and hydrophobic residues and resembles the calmodulin-binding domains of a variety of Ca<sup>2+</sup>-dependent proteins. A synthetic peptide corresponding to this sequence binds to calmodulin and inhibits Na<sup>+</sup>/Ca<sup>2+</sup> antiport activity (Li *et al.* 1991). This peptide has been designated XIP (for eXchange Inhibitor Peptide). It seems unlikely that this segment of the antiporter functions as an auto-inhibitory domain (by analogy to similar regions in calmodulin-dependent enzymes) since Na<sup>+</sup>/Ca<sup>2+</sup> antiport activity is unaffected by calmodulin.

Region 4 (residues 263–279; Fig. 2) exhibits 60 % identity to the rat erythrocyte anion antiporter (band 3a) and a 13-residue segment within this region shows an average of 48 % identity with 11 other band 3 proteins. Its role in the Na<sup>+</sup>/Ca<sup>2+</sup> antiporter is unknown. It is possible that it is involved in interactions with the cytoskeleton, since both the anion and the Na<sup>+</sup>/Ca<sup>2+</sup> antiporters interact with ankyrin (Li *et al.* 1993).

The significance of the other regions designated in Fig. 2 will be discussed in later sections of this chapter.

### Other Na<sup>+</sup>/Ca<sup>2+</sup> antiporters

Na<sup>+</sup>/Ca<sup>2+</sup> antiporters have been cloned from human, rat and cow heart and exhibit striking similarity to the canine heart antiporter (>90 % amino acid identity). Cardiac-type antiporters have also been cloned from brain, kidney and smooth muscle (see Nakasaki *et al.* 1993; Kofuji *et al.* 1994). They each show extensive homology with the canine antiporter and differ primarily within a limited region of the central hydrophilic domain, depicted as region 6 (residues 570–645) in Fig. 2. In this region, alternative splicing

mechanisms generate the various isoforms of the antiporter found in different tissues. Analysis of genomic clones reveals the presence of two mutually exclusive exons (A and B) coding for segments of 34 (B) or 35 (A) amino acids between positions 570 and 604/5; the amino acid sequences in these two exons are 34% identical. Following this region, there are four cassette-type exons (C, D, E and F) that may be inserted in various combinations; 32 possible isoforms can be generated in this manner (Kofuji *et al.* 1994). Thus, the cardiac isoform is A-C-D-E-F, the predominant patterns in brain are A-D or A-D-F, and in smooth muscle the pattern is principally B-D (Nakasaka *et al.* 1993). This mechanism accounts for all of the isoforms of the cardiac type antiporter thus far reported.

The reasons for the existence of tissue-specific isoforms are uncertain, especially since the kinetic properties of the antiporter are not likely to be affected by alterations in the hydrophilic domain (Matsuoka *et al.* 1993). However, as discussed below, interactions with the cytoskeleton may be important for both functional activity and the distribution of the antiporter on the membrane surface. The importance of membrane surface distribution for antiporter function is not yet well understood. In smooth muscle cells, the  $\text{Na}^+/\text{Ca}^{2+}$  antiporter and the  $\text{Na}^+/\text{K}^+$ -ATPase appear to be closely associated with each other and with the sarcoplasmic reticulum (Moore *et al.* 1993). In ventricular myocytes, the antiporter appears to be localized primarily to the T-tubules (Frank *et al.* 1992), although a second report disputes this claim (Kieval *et al.* 1992). Perhaps the different antiporter isoforms reflect specific requirements for interactions with the cytoskeleton and for particular membrane surface distributions in specific tissues.

Tissue-specific expression may also be regulated through the use of different promoters (Lee *et al.* 1994). RACE (rapid amplification of cDNA 5' ends) analysis of cDNAs from brain and kidney revealed three different mRNA isoforms which differed in the 5' untranslated region (UTR) upstream from position-34. Northern blot analysis revealed that unique 5'-UTR isoforms were expressed in heart and kidney, while a third variant was expressed in a wide variety of tissues and was particularly abundant in brain.

Cloning of the retinal rod  $\text{Na}^+/\text{Ca}^{2+}+\text{K}^+$  antiporter (Reiländer *et al.* 1992) revealed surprisingly little homology with the cardiac type of antiporter, although the predicted arrangement of the polypeptide chain within the membrane was similar. Significant homology was limited to two regions: a 60-residue segment (residues 130–189 in the canine cardiac sequence) spanning the second and third putative transmembrane segments in both antiporters and a 58-residue region (818–875) which includes transmembrane segment 8. These regions showed 38% and 28% sequence identity between the two proteins respectively. Mutations of some conserved residues in these two regions of the cardiac antiporter revealed four changes (G108A, P112A, S117A and E120Q) that did not affect activity, while seven additional mutations (mentioned above) resulted in loss of activity (Nicol *et al.* 1994). Unexpectedly, one of the latter mutations (S818A) is located in a rather hydrophilic loop between transmembrane segments 8 and 9 in the cardiac antiporter; however, this residue maps to the transmembrane segment itself in the retinal rod antiporter.

### **Regulation of $\text{Na}^+/\text{Ca}^{2+}$ antiport activity**

Two different, but perhaps related, regulatory processes have been identified. These

processes appear to involve two different inactive states of the carrier, the first promoted by the presence of cytosolic  $\text{Na}^+$  and the second promoted by the absence of cytosolic  $\text{Ca}^{2+}$  (Hilgemann *et al.* 1992a,b). Simulations based on this model account remarkably well for the regulatory properties of the antiporter as determined from current measurements in myocyte sarcolemmal patches.

#### ATP-dependent regulation

Although  $\text{Na}^+/\text{Ca}^{2+}$  antiport is not coupled to ATP hydrolysis, its kinetic characteristics are regulated by ATP. This has been established in previous studies with squid axons, barnacle muscle, vascular smooth muscle cells and cardiac myocytes (reviewed in Reeves, 1990; Hilgemann *et al.* 1992a,b). In squid axons and barnacle muscle, ATP decreases the  $K_m$  for cytosolic  $\text{Ca}^{2+}$  and for extracellular  $\text{Na}^+$ . The effects of ATP do not appear to involve a direct interaction with the exchanger protein, since ATP does not affect antiport activity in cardiac membrane vesicles.

In sarcolemmal patches, ATP attenuates the effects of cytosolic  $\text{Na}^+$  in promoting an inactive state of the antiporter (' $\text{Na}^+$ -dependent inactivation') (Collins *et al.* 1992; Hilgemann *et al.* 1992b). An example of  $\text{Na}^+$ -dependent inactivation is shown in Fig. 3. In this experiment, antiport currents were initiated in a giant membrane patch from a guinea pig ventricular cell by the addition of  $100\text{ mmol l}^{-1}$   $\text{Na}^+$  to the cytosolic membrane surface. As shown, there is a nearly instantaneous rise in outward antiport current, which subsequently declines over a period of several seconds to a fraction (30 % in Fig. 3) of its initial value. When  $\text{Mg}^{2+}$ -ATP is added following inactivation, a gradual increase in antiport current occurs. Subsequent cycles of  $\text{Na}^+$  addition show a much smaller degree of  $\text{Na}^+$ -dependent inactivation, even after removal of the ATP. Hilgemann and his colleagues (1992a,b) have suggested that binding of  $\text{Na}^+$  at the cytoplasmic membrane surface promotes a time-dependent entry of the antiporter into an inactive

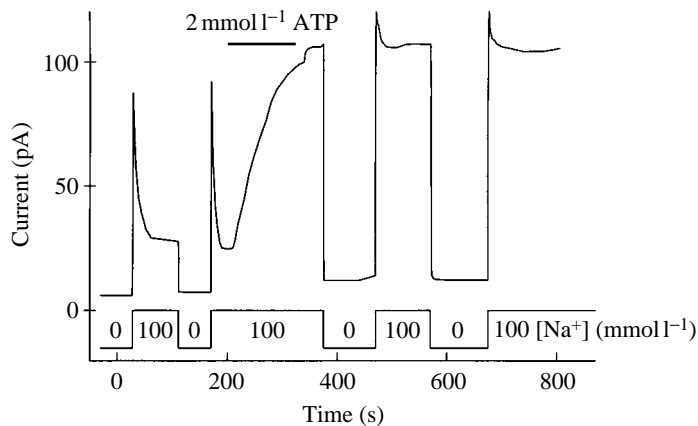

Fig. 3.  $\text{Na}^+$ -dependent inactivation of  $\text{Na}^+/\text{Ca}^{2+}$  pig ventricular sarcolemmal patches is initiated by repetitive addition of  $100\text{ mmol l}^{-1}$   $\text{NaCl}$  to the cytoplasmic membrane surface. As indicated by the bar,  $2\text{ mmol l}^{-1}$   $\text{Mg}^{2+}$ -ATP was also applied for 110 s during the second application of  $\text{Na}^+$ . Note that the decay of current during subsequent  $\text{Na}^+$  applications was almost eliminated. Reprinted from Collins *et al.* (1992) with permission.

state. This inactivation process is reversible upon removal of  $\text{Na}^+$  and is specific for the  $\text{Na}^+$ -bound configuration, since binding of cytosolic  $\text{Ca}^{2+}$  does not promote inactivation.  $\text{Na}^+$ -dependent inactivation is exacerbated at acidic cytosolic pH (Doering and Lederer, 1993) and can be attenuated by increasing  $[\text{Ca}^{2+}]_i$ .

The mechanism by which ATP counteracts  $\text{Na}^+$ -dependent inactivation is poorly understood. The evidence in squid axons suggests a phosphorylation mechanism (DiPolo and Beaugé, 1993), but antiport current measurements in cardiac sarcolemmal patches (Collins *et al.* 1992; Hilgemann and Collins, 1992) do not support this hypothesis. The latter studies suggest that the ATP effect is indirect and is mediated by an aminophospholipid translocase that maintains an elevated concentration of acidic phospholipids at the cytosolic surface of the membrane bilayer. This mechanism is consistent with the properties of the isolated antiporter, since activity is known to be stimulated by negatively charged amphiphiles, such as phosphatidylserine (Collins and Hilgemann, 1993).

ATP-dependent regulation of antiport activity has been examined in transfected Chinese hamster ovary (CHO) cells permanently expressing the bovine cardiac  $\text{Na}^+/\text{Ca}^{2+}$  antiporter (M. Condrescu, J. P. Gardner, G. Chernaya, J. F. Aceto, C. Kroupis and J. P. Reeves, in preparation). Depletion of cellular ATP using metabolic inhibitors caused a 40–50% decline in the initial rate of antiport-mediated  $\text{Ca}^{2+}$  influx and a much more dramatic decline in extracellular- $\text{Na}^+$ -dependent  $\text{Ca}^{2+}$  efflux. Cytosolic acidification by 0.6 pH units was observed during ATP depletion; however, restoration of the cytosolic pH in ATP-depleted cells to normal levels with  $\text{NH}_4\text{Cl}$  did not correct the decline in extracellular- $\text{Na}^+$ -dependent  $\text{Ca}^{2+}$  efflux, although it did stimulate  $\text{Ca}^{2+}$  influx. ATP depletion also enhanced the ability of extracellular  $\text{Na}^+$  to inhibit  $\text{Ca}^{2+}$  influx *via* the antiporter. An example of this type of experiment is shown in Fig. 4A. The  $K_i$  for  $[\text{Na}^+]_o$  was reduced from  $88 \text{ mmol l}^{-1}$  to  $55 \text{ mmol l}^{-1}$  in ATP-depleted cells. The effects of ATP depletion on antiport activity were either absent or greatly reduced in CHO cells expressing a mutant form of the antiporter in which 440 out of the 520 amino acids in the central hydrophilic domain had been deleted. Thus, the effects of ATP on antiport activity appear to be mediated by the central hydrophilic domain of the antiporter.

The effects of ATP depletion were not modified or mimicked by agents that affect protein kinases or phosphatases. Furthermore, a phosphorylated form of the antiporter could not be detected when the antiporter was immunoprecipitated from  $^{32}\text{P}$ -labelled cells, although  $^{35}\text{S}$ -labelled antiporter was easily observed. The results imply that a phosphorylation mechanism is not involved in the effects of ATP on antiport activity.

Treatment of the CHO cells with cytochalasin D, an agent that interferes with polymerization of cytoskeletal actin, mimics the effects of ATP depletion, as shown in Fig. 4B. Cytochalasin D did not affect the extracellular  $[\text{Na}^+]_o$  inhibition profile for cells expressing the deleted form of the antiporter. The results suggest that interaction of the antiporter with the cellular cytoskeleton has important functional consequences and that this may be at least partly responsible for ATP-dependent regulation of antiport activity. This interaction probably involves the central hydrophilic domain of the antiporter and might be mediated by ankyrin, a cytoskeletal protein that has been shown to bind to the cardiac antiporter (Li *et al.* 1993). This interpretation cannot explain the effects of ATP



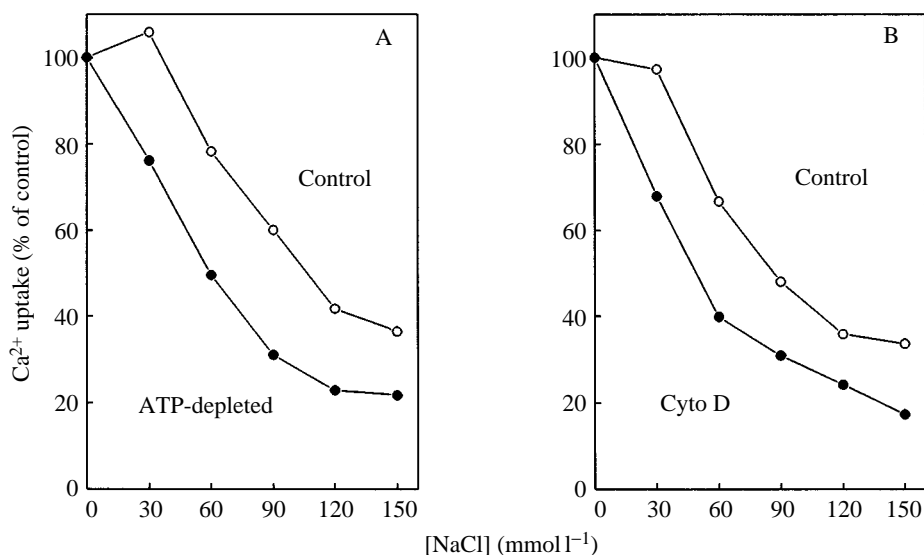

Fig. 4. Effect of ATP depletion (A) and cytochalasin D (Cyto D, B) on Na<sup>+</sup> inhibition of <sup>45</sup>Ca<sup>2+</sup> uptake in transfected CHO cells. (A) CHO cells permanently expressing the bovine cardiac Na<sup>+</sup>/Ca<sup>2+</sup> antiporter were preincubated for 30 min with 0.4 mmol l<sup>-1</sup> ouabain and then incubated with 2.5  $\mu$ g ml<sup>-1</sup> oligomycin plus 2  $\mu$ mol l<sup>-1</sup> rotenone for an additional 10 min; for control cells, 10 mmol l<sup>-1</sup> glucose was included in the medium to maintain cellular ATP levels. The initial rate of <sup>45</sup>Ca<sup>2+</sup> uptake was then assayed in mixtures of *N*-methyl-D-glucamine and NaCl to generate the final Na<sup>+</sup> concentrations shown. (B) CHO cells were preincubated for 30 min with ouabain and then assayed for the initial rate of <sup>45</sup>Ca<sup>2+</sup> uptake as described in A. Cytochalasin-D-treated cells were preincubated with the drug (1  $\mu$ mol l<sup>-1</sup>) for 60 min prior to ouabain treatment and assay. The data shown are from representative experiments.

on antiport currents in giant sarcolemmal patches, however, since cytoskeletal elements appear to be absent in these patches (D. Hilgemann, personal communication).

The effects of ATP depletion and cytochalasin D were greatly reduced in a second antiporter mutant. In this mutant, a string of acidic residues in the C-terminal portion of the hydrophilic domain (723–EDDDDDECGEE; region 7, Fig. 2) were changed to alanines. This region is of interest because an even more extensive string of acidic residues is found in the same position in the retinal rod Na<sup>+</sup>/Ca<sup>2+</sup>+K<sup>+</sup> antiporter. We initially considered the possibility that this region might serve as a means of guiding Ca<sup>2+</sup> by electrostatic interactions to transport binding sites within the transmembrane domains. It was surprising, then, that antiport-mediated Ca<sup>2+</sup> uptake and efflux in cells expressing this mutant did not appear to be abnormal. The alteration in regulatory properties suggests that this region may be involved, directly or indirectly, in the interaction of the antiporter with cytoskeletal elements.

#### *Intracellular-Ca<sup>2+</sup>-dependent activation*

Studies with internally dialyzed squid axons, barnacle muscle and cardiac myocytes have established that an interaction of cytosolic Ca<sup>2+</sup> with an activation site on the

antiporter (distinct from the  $\text{Ca}^{2+}$  transport site) is essential for 'reverse-mode'  $\text{Na}^+/\text{Ca}^{2+}$  antiport (i.e. intracellular- $\text{Na}^+$ -dependent  $\text{Ca}^{2+}$  influx). This is also evident from current measurements in cardiac sarcolemmal patches, where the  $K_m$  for intracellular- $\text{Ca}^{2+}$ -dependent activation is about  $0.8 \mu\text{mol l}^{-1}$  ( $\text{pHi}=7.0$ ;  $[\text{Na}^+]_i=18 \text{ mmol l}^{-1}$ ) and is shifted to higher concentrations by increased  $[\text{Na}^+]_i$  and by removal of ATP (Hilgemann *et al.* 1992a). The latter observations suggest that there is an interaction between the ATP-dependent and intracellular- $\text{Ca}^{2+}$ -dependent modes of regulation. The affinity of the intracellular  $\text{Ca}^{2+}$  activation site for  $\text{Ca}^{2+}$  increases markedly at alkaline  $\text{pHi}$  ( $K_{\text{Ca}}=9.6 \mu\text{mol l}^{-1}$  at  $\text{pH} 6.8$ ;  $K_{\text{Ca}} < 0.3 \mu\text{mol l}^{-1}$  at  $\text{pH} 7.8$ ; Hilgemann *et al.* 1992a); indeed, at very high  $\text{pHi}$  (8.8), activation of the antiporter by intracellular  $\text{Ca}^{2+}$  is completely lost. Although activation by intracellular  $\text{Ca}^{2+}$  has been demonstrated repeatedly for the 'reverse mode' of antiport activity, it has not been determined whether intracellular- $\text{Ca}^{2+}$ -dependent activation also regulates extracellular- $\text{Na}^+$ -dependent  $\text{Ca}^{2+}$  efflux; this is difficult to determine because cytosolic  $\text{Ca}^{2+}$  is also the transport substrate in this mode of antiport activity.

Recent studies by Philipson and his colleagues (Levitsky *et al.* 1994; Hryshko *et al.* 1994) have located the sites of secondary  $\text{Ca}^{2+}$  activation to a region spanning residues 371–508 in the hydrophilic domain (region 5; Fig. 2). These investigators measured  $\text{Ca}^{2+}$  binding to portions of the hydrophilic domain expressed as fusion proteins in bacteria and to various mutants expressed in the same way. Two acidic segments (446–DDDIFEED and 498–DDDHAGIFTFEE) within this region were both found to be essential for high-affinity  $\text{Ca}^{2+}$  binding ( $K_d=0.5 \mu\text{mol l}^{-1}$ ). Although the latter segment bears similarity to the  $\text{Ca}^{2+}$ -binding loop of EF hand structures, removal of the terminal E, which is essential for  $\text{Ca}^{2+}$  binding to EF hands, did not affect  $\text{Ca}^{2+}$  binding to the antiporter. Mutants that were defective in  $\text{Ca}^{2+}$  binding were also shown to be defective in secondary  $\text{Ca}^{2+}$  activation of antiport activity. Certain mutations within the two acidic segments described above led to a reduced affinity for activating  $\text{Ca}^{2+}$ . Other mutants were found in which antiport currents were independent of cytosolic  $\text{Ca}^{2+}$ . This elegant series of studies provides important new insights into the molecular mechanisms involved in the regulation of  $\text{Na}^+/\text{Ca}^{2+}$  antiport activity.

Intracellular- $\text{Ca}^{2+}$ -dependent activation has also been observed in transfected CHO cells expressing the cardiac antiporter. As shown in Fig. 5A, intracellular loading with 1,2-bis(2-aminophenoxy)ethane- $N,N,N',N'$ -tetra-acetic acid (BAPTA), a  $\text{Ca}^{2+}$  chelator, inhibited  $\text{Ca}^{2+}$  influx by  $\text{Na}^+/\text{Ca}^{2+}$  antiport; these effects were not observed in cells expressing a deleted form of the antiporter missing 440 out of 520 amino acids in the hydrophilic domain (Fig. 5B). Curiously, however, when BAPTA loading was omitted and  $[\text{Ca}^{2+}]_i$  was lowered (to less than  $50 \text{ nmol l}^{-1}$ ) by preincubation in a  $\text{Ca}^{2+}$ -free medium, the cells exhibited an apparent *stimulation* of antiport-mediated  $\text{Ca}^{2+}$  influx compared with cells preincubated in the presence of  $\text{Ca}^{2+}$ . Similar effects were observed in cells expressing the deletion mutant. These effects did not appear to be due to an increase in  $[\text{Na}^+]_i$  under  $\text{Ca}^{2+}$ -free conditions and persisted even when  $\text{Ca}^{2+}$  uptake into intracellular  $\text{Ca}^{2+}$  stores was blocked by the SERCA-ATPase inhibitor thapsigargin. The results suggest that cytosolic  $\text{Ca}^{2+}$ , in addition to activating  $\text{Ca}^{2+}$  influx at low concentrations, can also inhibit  $\text{Ca}^{2+}$  influx at higher concentrations, a phenomenon that

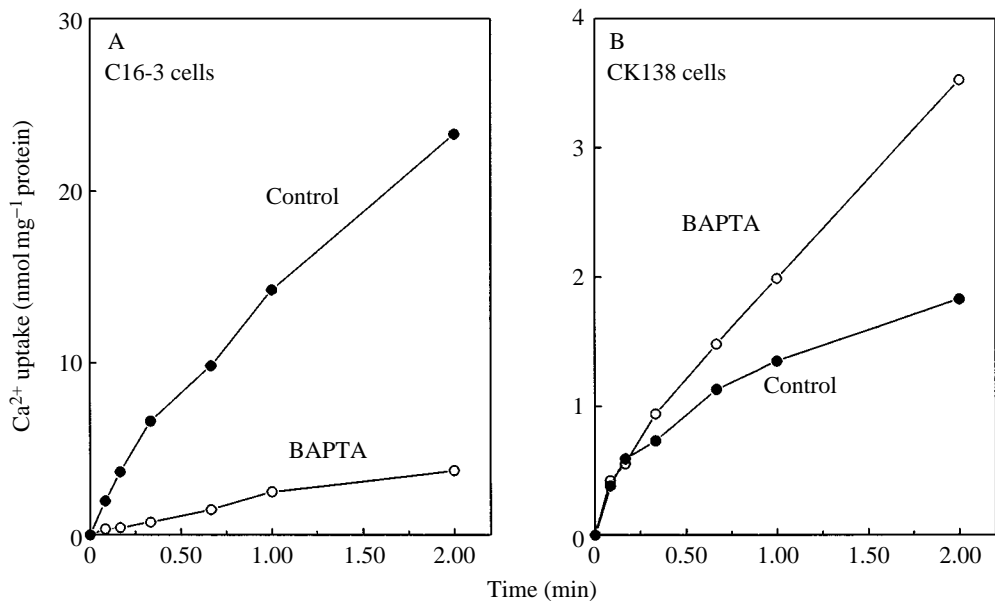

Fig. 5. Effect of intracellular BAPTA on <sup>45</sup>Ca<sup>2+</sup> uptake by Na<sup>+</sup>/Ca<sup>2+</sup> antiport in transfected CHO cells. Cells were preincubated for 30 min with ouabain with or without 10  $\mu\text{mol l}^{-1}$  BAPTA-AM and then assayed for <sup>45</sup>Ca<sup>2+</sup> uptake in a Na<sup>+</sup>-free medium (150 mmol l<sup>-1</sup> *N*-methyl-D-glucamine). C16-3 cells (A) express high levels of the wild-type bovine cardiac Na<sup>+</sup>/Ca<sup>2+</sup> antiporter; the CK138 (B) cells express a deleted form of the antiporter missing 440 out of 520 amino residues of the hydrophilic domain. Note that total antiport activity is much lower in the CK138 cells than in the C16-3 cells. Intracellular BAPTA inhibits the initial rate of <sup>45</sup>Ca<sup>2+</sup> uptake in the wild-type cells but not in the CK138 cells; the enhancement of uptake observed during the later portion of the time course for the CK138 cells probably reflects reduced <sup>45</sup>Ca<sup>2+</sup> efflux due to chelation of intracellular Ca<sup>2+</sup> by the BAPTA.

has also been reported for vascular smooth muscle cells (Lyu *et al.* 1992). The mechanism of the latter effect is uncertain, but it must involve a fundamentally different type of interaction from that responsible for secondary Ca<sup>2+</sup> activation, since it does not require the presence of the central hydrophilic domain.

### Conclusions

The major features of the Na<sup>+</sup>/Ca<sup>2+</sup> antiporter's physiological function and molecular architecture are now well understood. Two important areas for future research are discussed below.

#### *What is the physiological significance of regulation of antiport activity?*

The importance of secondary activation by Ca<sup>2+</sup> is poorly understood. One possibility is that it provides a mechanism for 'turning off' Ca<sup>2+</sup> efflux by the antiporter once [Ca<sup>2+</sup>]<sub>i</sub> has attained a low value. In this respect, the Na<sup>+</sup>/Ca<sup>2+</sup> antiporter might be similar to the Na<sup>+</sup>/H<sup>+</sup> antiporter, which is secondarily regulated by cytosolic protons. Extending the

analogy, it would be of great interest to learn whether the 'set point' for the  $\text{Na}^+/\text{Ca}^{2+}$  antiporter, like that of the  $\text{Na}^+/\text{H}^+$  antiporter, can be altered by growth factors or hormones. This type of regulation could exert an important influence on the intracellular  $\text{Ca}^{2+}$  stores in cardiac myocytes and in other cells.

The importance of ATP-dependent regulation is even less well understood. One possibility is that the decline in antiporter function during periods of ATP depletion may protect the cells against  $\text{Ca}^{2+}$  overload. However, it seems more likely that there is an important role for this mode of regulation in normal cellular function. If ATP-dependent regulation reflects interactions with the cytoskeleton, then its importance may be tied in with locating antiport activity in proximity to particular subcellular compartments. This possibility is supported by the observation that the antiporter appears to be closely associated with the  $\text{Na}^+/\text{K}^+$ -ATPase and the sarcoplasmic reticulum in smooth muscle cells (Moore *et al.* 1993). Compartmentation of  $\text{Ca}^{2+}$  homeostatic mechanisms represents a new research frontier for which specific experimental tools and approaches are greatly needed.

*Is the antiporter an important pathway for  $\text{Ca}^{2+}$  influx?*

In many, if not most, cells, the thermodynamic driving force for  $\text{Na}^+/\text{Ca}^{2+}$  antiport (equation 1) favours net  $\text{Ca}^{2+}$  efflux under resting conditions. We have already discussed how this driving force might become transiently reversed during the early portions of the cardiac action potential, leading to a transient  $\text{Ca}^{2+}$  influx which can serve as a trigger for  $\text{Ca}^{2+}$ -induced  $\text{Ca}^{2+}$  release from the sarcoplasmic reticulum (Leblanc and Hume, 1990). Even when the balance of forces favours net  $\text{Ca}^{2+}$  efflux, however, there is a substantial unidirectional  $\text{Ca}^{2+}$  influx catalyzed by the antiporter. This could constitute an important pathway for refilling or maintaining intracellular  $\text{Ca}^{2+}$  stores. In this respect, it is important to note that the total thermodynamic driving force for  $\text{Na}^+/\text{Ca}^{2+}$  antiport *plus* ATP-dependent  $\text{Ca}^{2+}$  uptake into internal stores favours the net entry of  $\text{Ca}^{2+}$  into the cell and its sequestration by internal organelles. Thus, the presence of the antiporter could promote a high level of  $\text{Ca}^{2+}$  recycling through the cell and its intracellular compartments. The possible consequences of this activity on the  $\text{Ca}^{2+}$  content of intracellular stores, cellular adaptability to environmental change and pathological conditions, such as essential hypertension, need further exploration.

### References

- BERS, D. M. AND BRIDGE, J. H. B. (1989). Relaxation of rabbit ventricular muscle by  $\text{Na}^+/\text{Ca}^{2+}$  exchange and sarcoplasmic reticulum calcium pump. Ryanodine and voltage sensitivity. *Circulation Res.* **65**, 334–342.
- BLAUSTEIN, M. P., DiPOLO, R. AND REEVES, J. P. (1991). Sodium–calcium exchange. *Ann. N. Y. Acad. Sci.* **639**.
- CERVETTO, L., LAGNADO, L., PERRY, R. J., ROBINSON, D. W. AND MCNAUGHTON, P. A. (1989). Extrusion of calcium from rod outer segments is driven by both sodium and potassium gradients. *Nature* **337**, 740–743.
- CLARKE, D. M., LOO, T. W., INESI, G. AND MACLENNAN, D. H. (1989). Location of high affinity Ca-binding sites within the predicted transmembrane domain of the sarcoplasmic reticulum Ca-ATPase. *Nature* **339**, 476–478.

- COLLINS, A. AND HILGEMANN, D. W. (1993). A novel method for the direct application of phospholipids to giant excised membrane patches in the study of sodium–calcium exchange and sodium channel. *Pflügers Arch. Europ. J. Physiol.* **423**, 347–355.
- COLLINS, A., SOMLYO, A. V. AND HILGEMANN, D. W. (1992). The giant cardiac membrane patch method: stimulation of outward  $\text{Na}^+/\text{Ca}^{2+}$  exchange current by MgATP. *J. Physiol., Lond.* **454**, 27–57.
- DIPOLLO, R. AND BEAUGÉ, L. (1993) Effects of some metal–ATP complexes on Na–Ca exchange in internally dialysed squid axons. *J. Physiol., Lond.* **462**, 71–86.
- DOERING, A. E. AND LEDERER, W. J. (1993). The mechanism by which cytoplasmic  $\text{H}^+$  inhibits the Na/Ca exchanger in guinea-pig heart cells. *J. Physiol., Lond.* **464**, 481–499.
- DURKIN, J. T., AHRENS, D. C., PAN, Y. C. E. AND REEVES, J. P. (1991). Purification and amino terminal sequence of the bovine cardiac sodium–calcium antiporter: evidence for the presence of a signal sequence. *Archs Biochem. Biophys.* **290**, 369–375.
- FRANK, J. S., MOTTINO, G., REID, D., MOLDAV, R. S. AND PHILIPSON, K. D. (1992). Distribution of the  $\text{Na}^+/\text{Ca}^{2+}$  exchange protein in mammalian cardiac myocytes: an immunofluorescence and immunocolloidal gold-labeling study. *J. Cell Biol.* **117**, 337–345.
- HILGEMANN, D. W. (1986). Extracellular calcium transients and action potential configuration changes related to post-stimulatory potentiation in rabbit atrium. *J. gen. Physiol.* **87**, 675–706.
- HILGEMANN, D. W. AND COLLINS, A. (1992). Mechanism of cardiac  $\text{Na}^+/\text{Ca}^{2+}$  exchange current stimulation by MgATP: possible involvement of aminophospholipid translocase. *J. Physiol., Lond.* **454**, 59–82.
- HILGEMANN, D. W., COLLINS, A. AND MATSUOKA, S. (1992a). Steady state and dynamic properties of cardiac sodium–calcium exchange: secondary modulation by cytoplasmic calcium and ATP. *J. gen. Physiol.* **100**, 933–961.
- HILGEMANN, D. W., MATSUOKA, S., NAGEL, G. A. AND COLLINS, A. (1992b). Steady state and dynamic properties of cardiac sodium–calcium exchange: sodium-dependent inactivation. *J. gen. Physiol.* **100**, 905–932.
- HILGEMANN, D. W., NICOLL, D. A. AND PHILIPSON, K. D. (1991). Charge movement during  $\text{Na}^+$  translocation by native and cloned cardiac  $\text{Na}^+/\text{Ca}^{2+}$  exchanger. *Nature* **352**, 715–718.
- HRYSKO, L. V., MATSUOKA, S., NICOLL, D. A., LEVITSKY, D., HILGEMANN, D. W. AND PHILIPSON, K. D. (1994).  $\text{Ca}_i$  regulation of the cardiac  $\text{Na}^+/\text{Ca}^{2+}$  antiporter. *Biophys. J.* **66**, A331.
- HRYSKO, L. V., NICOLL, D. A., WEISS, J. N. AND PHILIPSON, K. D. (1993). Biosynthesis and initial processing of the cardiac sarcolemmal  $\text{Na}^+/\text{Ca}^{2+}$  antiporter. *Biochim. biophys. Acta* **1151**, 35–42.
- KIEVAL, R. S., BLOCK, R. J., LINDENMAYER, G. E., AMBESI, A. AND LEDERER, W. J. (1992). Immunofluorescence localization of the  $\text{Na}^+/\text{Ca}^{2+}$  antiporter in heart. *Am. J. Physiol.* **263**, C545–C550.
- KIMURA, J., MIYAMAE, S. AND NOMA, A. (1987). Identification of sodium–calcium exchange current in single ventricular cells of guinea pig. *J. Physiol., Lond.* **384**, 199–222.
- KIMURA, M., AVIV, A. AND REEVES, J. P. (1993). K-dependent  $\text{Na}^+/\text{Ca}^{2+}$  exchange in human platelets. *J. biol. Chem.* **268**, 6874–6877.
- KOFUJI, P., LEDERER, W. J. AND SCHULZE, D. H. (1994). Mutually exclusive and cassette exons underlie alternatively spliced isoforms of the  $\text{Na}^+/\text{Ca}^{2+}$  antiporter. *J. biol. Chem.* **269**, 5145–5149.
- LEBLANC, N. AND HUME, J. R. (1990). Sodium current-induced release of calcium from cardiac sarcoplasmic reticulum. *Science* **248**, 372–375.
- LEDERER, W. J., NIGGLI, E. AND HADLEY, R. W. (1990). Sodium–calcium exchange in excitable cells: fuzzy space. *Science* **248**, 283.
- LEE, S.-L., YU, A. S. L. AND LYTTON, J. (1994). Tissue specific expression of  $\text{Na}^+/\text{Ca}^{2+}$ -antiporter isoforms. *J. biol. Chem.* (in press).
- LEVITSKY, D. O., BURKE, E. A., NICOLL, D. A. AND PHILIPSON, K. D. (1994). Localization of a high-affinity calcium binding site in the  $\text{Na}^+/\text{Ca}^{2+}$  antiporter. *Biophys. J.* **66**, A330.
- LI, A., BURKE, E. P., FRANK, J. S., BENNETT, V. AND PHILIPSON, K. S. (1993). The cardiac  $\text{Na}^+/\text{Ca}^{2+}$  antiporter binds to the cytoskeletal protein ankyrin. *J. biol. Chem.* **268**, 11489–11491.
- LI, Z., NICOLL, D. A., COLLINS, A., HILGEMANN, D. W., FILOTEO, A. G., PENNISTON, J. T., WEISS, J. N., TOMICH, J. M. AND PHILIPSON, K. D. (1991). Identification of a peptide inhibitor of the cardiac sarcolemmal  $\text{Na}^+/\text{Ca}^{2+}$  antiporter. *J. biol. Chem.* **266**, 1014–1020.
- LYU, R.-M., SMITH, L. AND SMITH, J. B. (1992).  $\text{Ca}^{2+}$  influx via  $\text{Na}^+/\text{Ca}^{2+}$  exchange in immortalized aortic myocytes. II. Feedback inhibition by  $[\text{Ca}]_i$ . *Am. J. Physiol.* **263**, C635–C641.
- MATSUOKA, S., NICOLL, D. A., REILLY, R. F., HILGEMANN, D. W. AND PHILIPSON, K. D. (1993). Initial

- localization of regulatory regions of the cardiac sarcolemmal  $\text{Na}^+-\text{Ca}^{2+}$  antiporter. *Proc. natn. Acad. Sci. U.S.A.* **90**, 3870–3874.
- MOORE, E. D. W., ETTER, E. F., PHILIPSON, K. D., CARRINGTON, W. A., FOGARTY, K. E., LIFSHITZ, L. M. AND FAY, F. S. (1993). Coupling of the  $\text{Na}^+/\text{Ca}^{2+}$  antiporter,  $\text{Na}^+/\text{K}^+$  pump and sarcoplasmic reticulum in smooth muscle. *Nature* **365**, 657–660.
- NAKASAKI, Y., IWAMOTO, T., HANADA, H., IMAGAWA, T. AND SHIGEKAWA, M. (1993). Cloning of the rat aortic smooth muscle  $\text{Na}^+/\text{Ca}^{2+}$  antiporter and tissue-specific expression of isoforms. *J. Biochem., Tokyo* **114**, 528–534.
- NICOLL, D. A., HRYSHKO, L. V., MATSUOKA, S., WU, R.-Y., HILGEMANN, D. W. AND PHILIPSON, K. D. (1994). Mutations in the putative transmembrane segments of the canine cardiac sarcolemmal  $\text{Na}^+/\text{Ca}^{2+}$  antiporter. *Biophys. J.* **66**, A330.
- NICOLL, D. A., LONGONI, S. AND PHILIPSON, K. D. (1990). Molecular cloning and functional expression of the cardiac sarcolemmal  $\text{Na}^+-\text{Ca}^{2+}$  antiporter. *Science* **250**, 562–565.
- POST, J. A., KUWATA, J. H. AND LANGER, G. A. (1993). A discrete  $\text{Na}^+/\text{Ca}^{2+}$  exchange dependent,  $\text{Ca}^{2+}$  compartment in cultured neonatal rat heart cells. Characteristics, localization and possible physiological function. *Cell Calcium* **14**, 61–71.
- REEVES, J. P. (1985).  $\text{Na}-\text{Ca}$  exchanger,  $[\text{Ca}^{2+}]_i$  and myocardial contractility. In *Pathobiology of Cardiovascular Injury* (ed. H. L. Stone and W. B. Weglicki), pp. 232–244. Boston: Martinus Nijhoff Publishing.
- REEVES, J. P. (1990). Sodium–calcium exchange. In *Intracellular Calcium Regulation* (ed. F. Bronner), pp. 305–347. New York: Wiley-Liss.
- REEVES, J. P. AND HALE, C. C. (1984). The stoichiometry of the cardiac sodium–calcium exchange system. *J. biol. Chem.* **259**, 7733–7739.
- REILÄNDER, H., ACHILLES, A., FRIEDEL, U., MAUL, G., LOTTSPEICH, F. AND COOK, N. J. (1992). Primary structure and functional expression of the  $\text{Na}^+/\text{Ca}^{2+}/\text{K}^+$  from bovine rod photoreceptors. *EMBO J.* **11**, 1689–1695.
- SCHNETKAMP, P. P. M., BASU, D. K. AND SZERENCSEI, R. T. (1989).  $\text{Na}^+-\text{Ca}^{2+}$  exchange in bovine rod outer segments requires and transports K. *Am. J. Physiol.* **257**, C153–C157.
- SHATTOCK, M. J. AND BERS, D. M. (1989). Rat vs. rabbit ventricle:  $\text{Ca}^{2+}$  flux and intracellular Na assessed by ion-selective microelectrodes. *Am. J. Physiol.* **256**, C813–C822.
